# Supplementary material for: Evaluation of Monte Carlo tools for high energy atmospheric physics
Source: Copernicus journal article supplement (doi:10.5194/gmd-9-3961-2016), 2016-11-08
Supplement: Supplementary file 1 [file gmd-9-3961-2016-supplement.zip]

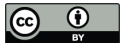

## *Supplement of*

# **Evaluation of Monte Carlo tools for high energy atmospheric physics**

**Casper Rutjes et al.**

*Correspondence to:* Casper Rutjes ([casper.rutjes@cwil.nl](mailto:casper.rutjes@cwil.nl))

- [gmd-9-3961-2016-supplement-title-page.pdf](#)
- Supplement
  - .DS\_Store
  - CODES
    - \* .DS\_Store
    - \* FLUKA
    - \* Geant4
    - \* MC-PEPTITA
    - \* egs5
    - \* grrr
  - FIGURES
    - \* .DS\_Store
    - \* Supplement\_Figures.pdf
  - PERFORMANCE
    - \* .DS\_Store
    - \* pidec.cpp
    - \* supplement\_performance.pdf

The copyright of individual parts of the supplement might differ from the CC-BY 3.0 licence.
